# Supplementary material for: Searching algorithm for type IV secretion system effectors 1.0: a tool for predicting type IV effectors and exploring their genomic context
Source: PubMed Central journal article supplement — Nucleic Acids Res. 2013 Aug 13;41(20):9218–29. doi: 10.1093/nar/gkt718 (PMC3814349; doi:10.1093/nar/gkt718), 2013-08-13
Supplement: supp_gkt718_nar-01344-n-2013-File006.pdf [file supp_gkt718_nar-01344-n-2013-File006.pdf]

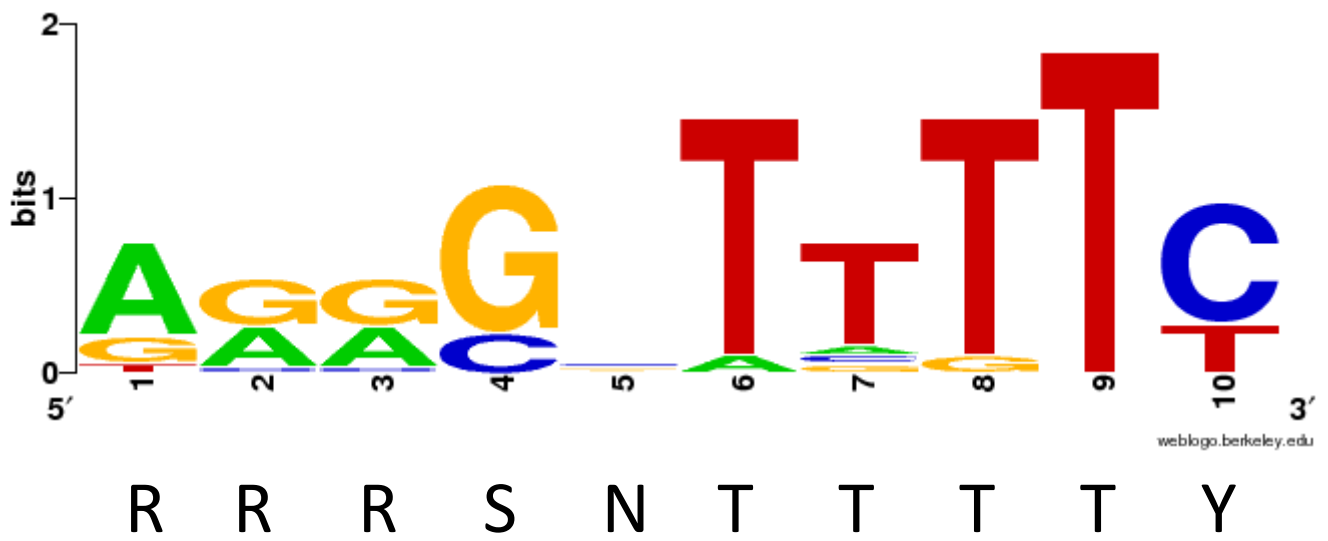

**Figure S1. WebLogo of the RS\_TY motif.** The MEME motif search was performed on the upstream regions (-300) of known Type IV effectors encoding genes in  $\alpha$ -proteobacteria. The motif logo was generated by WebLogo (61).

```

# S4TE 1.0
# Use of compilation.pl program version 1.0
# File list: /Users/pathway_to_S4TE/S4TE/Jobs/jobLegionellapneumophila2013541428/
FileList.txt
# threshold : 5
# Weighting code : 1311111111111
# The code corresponds to the boolean result in the following software sequence :
# RS_TY.pl blastcut.pl PfamManager.pl NLS.pl Mitocut.pl CaaX.pl pepcoilcut.pl charge.pl
hydro.pl E-block.pl
# Compilation on 4/5/2013 at 15h41
//
Number of proteins with a score of 9 : 4
Number of proteins with a score of 8 : 16
Number of proteins with a score of 7 : 63
Number of proteins with a score of 6 : 108
Number of proteins with a score of 5 : 123
Number of proteins with a score of 4 : 229
Number of proteins with a score of 3 : 554
Number of proteins with a score of 2 : 955
Number of proteins with a score of 1 : 712
//
lpg0695 : ankyrin repeat-containing protein [Legionella pneumophila pneumophila
Philadelphia-1]
Score : 9
number of hits : 7
Code : 0110000111110    SIL : 1 PIL : 0

//
lpg2490 : LepB [Legionella pneumophila pneumophila Philadelphia-1]
Score : 9
number of hits : 7
Code : 1100100101110    SIL : 1 PIL : 0

//
lpg1701 : kinectin 1 (kinesin receptor) [Legionella pneumophila pneumophila
Philadelphia-1]
Score : 9
number of hits : 7
Code : 1100100100111    SIL : 1 PIL : 0

//
lpg1227 : hypothetical protein [Legionella pneumophila pneumophila Philadelphia-1]
Score : 9
number of hits : 7
Code : 1110000100111    SIL : 1 PIL : 0

//
lpg1953 : coiled-coil-containing protein [Legionella pneumophila pneumophila
Philadelphia-1]
Score : 8
number of hits : 6
Code : 1100100100110    SIL : 1 PIL : 0

//
lpg1890 : leucine-rich repeat- and coiled coil-containing protein [Legionella pneumophila
pneumophila Philadelphia-1]
Score : 8
number of hits : 6
Code : 0110000101110    SIL : 1 PIL : 0

```

**Figure S2. Example of S4TE output file (*CompilationFile.txt*)**

```
# S4TE 1.0 summary results
# Genome : jobLegionellapneumophila201353137
# Threshold : 5
# Weighting code : 13111111111111
```

Results:

```
Number of proteins with a score of 9 : 4
Number of proteins with a score of 8 : 16
Number of proteins with a score of 7 : 63
Number of proteins with a score of 6 : 108
Number of proteins with a score of 5 : 123
Number of proteins with a score of 4 : 229
Number of proteins with a score of 3 : 554
Number of proteins with a score of 2 : 955
Number of proteins with a score of 1 : 712
```

Hits Results :

```
GeneNumber;CDS_name;start;end;3'FIR;5'FIR;Nb Hits
637131911;lpg1972;2212015;2212392;223;463;3
637131296;lpg1356;1501020;1502150;138;486;3
637131465;lpg1525;1688628;1689866;13;74;5
637131085;lpg1144;1258828;1259334;346;258;4
637130562;lpg0621;654121;655545;89;160;3
637132655;lpg2718;3069837;3071399;709;280;5
637131167;lpg1227;1353613;1355409;392;194;7
637131479;lpg1539;1704272;1704697;54;0;3
637130839;lpg0898;972975;973706;272;211;3
637131606;lpg1666;1849247;1850650;264;161;4
637132237;lpg2298;2596514;2597791;362;593;4
637132493;lpg2555;2888571;2889425;476;587;3
637131737;lpg1798;2005655;2006851;184;524;4
637132155;lpg2216;2500553;2502325;20;249;4
637131050;lpg1109;1212967;1215027;238;504;5
637132891;lpg2959;3348048;3349640;206;296;3
637131042;lpg1101;1204272;1205240;281;488;6
637132624;lpg2687;3037576;3038031;0;112;5
637131887;lpg1948;2175670;2176677;11;308;4
637131627;lpg1687;1877800;1879002;50;36;5
637130133;lpg0190;220962;221183;102;52;5
637130379;lpg0437;474811;476811;284;262;5
637130103;lpg0160;192160;193137;253;220;4
637132111;lpg2172;2437187;2438290;121;170;4
637132465;lpg2527;2856264;2857940;306;166;5
637132210;lpg2271;2574377;2575027;174;151;3
637131424;lpg1484;1639917;1640726;53;198;4
637132339;lpg2400;2711277;2712341;208;292;3
637132094;lpg2155;2407667;2410288;265;52;3
637131181;lpg1241;1368713;1371382;164;67;6
637132107;lpg2168;2433697;2434470;0;189;3
637132528;lpg2591;2924663;2925160;116;172;3
637131062;lpg1121;1231463;1232233;627;581;4
637130228;lpg0285;339639;340322;32;236;3
637130464;lpg0522;564885;565352;0;151;4
637130382;lpg0440;478631;478843;170;91;3
637131088;lpg1147;1263574;1264077;289;60;4
637131925;lpg1986;2226164;2229016;168;176;5
637132764;lpg2830;3201113;3201853;120;251;4
637131915;lpg1976;2215443;2216303;177;0;5
637130347;lpg0405;446478;447068;199;0;3
```

```
637132382;lpg2443;2757867;2758424;123;226;3
637131457;lpg1517;1678858;1679994;86;3;5
637132261;lpg2322;2623900;2625825;92;86;3
637130345;lpg0403;443204;444748;336;179;5
637132313;lpg2374;2680222;2680533;347;447;3
637131945;lpg2006;2245044;2246900;81;57;6
637129958;lpg0015;19643;20716;0;100;4
637130033;lpg0090;99689;103663;214;110;4
637132070;lpg2131;2374714;2375256;16;18;4
637131658;lpg1718;1914091;1915728;390;143;3
637132115;lpg2176;2440714;2442540;3;216;4
637131790;lpg1851;2072773;2073435;23;345;4
637130674;lpg0733;799869;801317;51;165;4
637131582;lpg1642;1815442;1816695;200;255;5
637132479;lpg2541;2872931;2873764;114;285;5
637130069;lpg0126;143588;146896;96;113;4
637131601;lpg1661;1838135;1839253;93;160;6
637131423;lpg1483;1638274;1639863;53;145;5
637131864;lpg1925;2149854;2152499;69;316;5
637131070;lpg1129;1243201;1244760;128;427;4
637131561;lpg1621;1789603;1790922;169;119;4
637132283;lpg2344;2647010;2647636;727;110;3
637130837;lpg0896;971284;971661;81;5;3
637130881;lpg0940;1017170;1019359;179;241;5
637132707;lpg2772;3121904;3124510;3;88;5
637132310;lpg2371;2675881;2676495;698;542;3
637132271;lpg2332;2635647;2636246;28;0;4
637132058;lpg2119;2363881;2364906;667;158;5
637132098;lpg2159;2422285;2423406;28;292;5
637131632;lpg1692;1885806;1887116;0;293;3
637131898;lpg1959;2191518;2193512;184;252;3
637132765;lpg2831;3202105;3203970;54;251;5
637131172;lpg1232;1359759;1361036;613;0;5
637130138;lpg0195;225828;226832;131;201;3
637132821;lpg2888;3268809;3270722;130;227;3
637130164;lpg0221;251956;254244;13;14;5
637132932;lpg3000;3391800;3393638;0;295;5
```

FIR Results:

| -----  |             |             |             |
|--------|-------------|-------------|-------------|
|        | 639(21.7 %) | 835(28.4 %) |             |
| Genome | -----       | -----       | total :2941 |
|        | 825(28.1 %) | 642(21.8 %) |             |
| -----  |             |             |             |
|        | 71(22.8 %)  | 164(52.7 %) |             |
| Hits   | -----       | -----       | total :311  |
|        | 24(7.7 %)   | 52(16.7 %)  |             |
| -----  |             |             |             |

Figure S3. Example of S4TE summary of results (*Results.txt*)

| Domain name          | Pfam ID number | Description                                         |
|----------------------|----------------|-----------------------------------------------------|
| <b>Sec7</b>          | PF01369.15     | Sec7 domain                                         |
| <b>Ank</b>           | PF00023.25     | Ankyrin repeat                                      |
| <b>Ank_3</b>         | PF13606.1      | Ankyrin repeat                                      |
| <b>Ank_4</b>         | PF13637.1      | Ankyrin repeat (many copies)                        |
| <b>Ank_5</b>         | PF13857.1      | Ankyrin repeat (many copies)                        |
| <b>SET</b>           | PF00856.23     | SET domain                                          |
| <b>F-box</b>         | PF00646.28     | F-box domain                                        |
| <b>F-box-like</b>    | PF12937.2      | F-box-like                                          |
| <b>F-box-like_2</b>  | PF13013.1      | F-box-like domain                                   |
| <b>LRR</b>           | PF13855.1      | Leucine rich repeat                                 |
| <b>Pkinase</b>       | PF00069.20     | Protein kinase domain                               |
| <b>Metallophos_2</b> | PF12850.2      | Calcineurin-like phosphoesterase superfamily domain |
| <b>Pyridoxal_deC</b> | PF00282.14     | Pyridoxal-dependent decarboxylase conserved domain  |
| <b>RCC1</b>          | PF00415.13     | Regulator of chromosome condensation (RCC1) repeat  |
| <b>RCC1_2</b>        | PF13540.1      | Regulator of chromosome condensation (RCC1) repeat  |
| <b>RasGEF</b>        | PF00617.14     | RasGEF domain                                       |
| <b>RasGEF_N</b>      | PF00618.15     | RasGEF N-terminal motif                             |
| <b>U-box</b>         | PF04564.10     | U-box domain                                        |
| <b>cNMP_binding</b>  | PF00027.24     | Cyclic nucleotide binding domain                    |
| <b>Glycohydro_11</b> | PF00457.12     | Glycosyl hydrolases family 11                       |
| <b>Glycohydro_12</b> | PF01670.11     | Glycosyl hydrolases family 12                       |
| <b>Glycohydro_14</b> | PF01373.12     | Glycosyl hydrolases family 14                       |
| <b>Glycohydro_15</b> | PF00723.16     | Glycosyl hydrolases family 15                       |
| <b>Glycohydro_16</b> | PF00722.16     | Glycosyl hydrolases family 16                       |
| <b>Glycohydro_17</b> | PF00332.13     | Glycosyl hydrolases family 17                       |
| <b>Glycohydro_18</b> | PF00704.23     | Glycosyl hydrolases family 18                       |
| <b>PhyH</b>          | PF05721.8      | Pytanoyl-CoA dioxygenase (PhyH)                     |
| <b>Astacin</b>       | PF01400.19     | Astacin (Peptidase family M12A)                     |
| <b>Thaumat</b>       | PF00314.12     | Thaumat family                                      |

**Table S1. List of the 58 eukaryotic domains searched by S4TE (*PfamManager.pl*)**

| <b>Domain name</b>     | <b>Pfam ID number</b> | <b>Description</b>              |
|------------------------|-----------------------|---------------------------------|
| <b>Acetyltransf_1</b>  | PF00583.19            | Acetyltransferase (GNAT) family |
| <b>Acetyltransf_10</b> | PF13673.1             | Acetyltransferase (GNAT) family |
| <b>Patatin</b>         | PF01734.17            | Patatin-like phospholipase      |
| <b>TRP_1</b>           | PF00515.23            | Tetratricopeptide repeat        |
| <b>TRP_10</b>          | PF13374.1             | Tetratricopeptide repeat        |
| <b>TRP_11</b>          | PF13414.1             | Tetratricopeptide repeat        |
| <b>TRP_12</b>          | PF13424.1             | Tetratricopeptide repeat        |
| <b>TRP_14</b>          | PF13428.1             | Tetratricopeptide repeat        |
| <b>TRP-15</b>          | PF13429.1             | Tetratricopeptide repeat        |
| <b>TRP-16</b>          | PF13432.1             | Tetratricopeptide repeat        |
| <b>TRP-17</b>          | PF13431.1             | Tetratricopeptide repeat        |
| <b>TRP-18</b>          | PF13512.1             | Tetratricopeptide repeat        |
| <b>TRP-2</b>           | PF07719.12            | Tetratricopeptide repeat        |
| <b>TRP-3</b>           | PF07720.7             | Tetratricopeptide repeat        |
| <b>TRP-4</b>           | PF07721.9             | Tetratricopeptide repeat        |
| <b>TRP-5</b>           | PF12688.2             | Tetratricopeptide repeat        |
| <b>TRP-6</b>           | PF13174.1             | Tetratricopeptide repeat        |
| <b>TRP-7</b>           | PF13176.1             | Tetratricopeptide repeat        |
| <b>TRP-8</b>           | PF13181.1             | Tetratricopeptide repeat        |
| <b>TRP-9</b>           | PF13371.1             | Tetratricopeptide repeat        |
| <b>SNARE</b>           | PF05739.14            | SNARE domain                    |
| <b>SNARE assoc</b>     | PF09335.6             | SNARE associated Golgi protein  |
| <b>HIT</b>             | PF01230.18            | HIT domain                      |
| <b>PD40</b>            | PF07676.7             | WD40-like Beta Propeller Repeat |
| <b>Band_7</b>          | PF01145.20            | SPFH domain / Band 7 family     |
| <b>Band_7_1</b>        | PF00533.21            | SPFH domain-Band 7 family       |
| <b>BRCT</b>            | PF02661.13            | BRCA1 C Terminus (BRCT) domain  |
| <b>Fic</b>             | PF13784.1             | Fic/DOC family                  |
| <b>Fic_N</b>           | PF06207.6             | Fic/DOC family N-terminal       |

**Table S1 (cont.). List of the 58 eukaryotic domains searched by S4TE (*PfamManager.pl*)**

| Number of features | Code            | 1  | 2 | 3 | 4 | 5 | 6 | 7 | 8 | 9 | 10 | 11 | 12 | 13 | TP | %TP   | FP | %FP   | SI <sub>L</sub> | PI <sub>L</sub> |
|--------------------|-----------------|----|---|---|---|---|---|---|---|---|----|----|----|----|----|-------|----|-------|-----------------|-----------------|
| 3                  | 010000001100    |    |   |   |   |   |   |   |   |   |    |    |    |    | 12 | 5.38  | 0  | 0.00  | 1.00            | 0               |
| 3                  | 010000100100    |    |   |   |   |   |   |   |   |   |    |    |    |    | 5  | 2.24  | 0  | 0.00  | 1.00            | 0               |
| 3                  | 110000000100    |    |   |   |   |   |   |   |   |   |    |    |    |    | 2  | 0.90  | 0  | 0.00  | 1.00            | 0               |
| 3                  | 010000000110    |    |   |   |   |   |   |   |   |   |    |    |    |    | 2  | 0.90  | 0  | 0.00  | 1.00            | 0               |
| 3                  | 110000000010    |    |   |   |   |   |   |   |   |   |    |    |    |    | 2  | 0.90  | 0  | 0.00  | 1.00            | 0               |
| 3                  | 010001000100    |    |   |   |   |   |   |   |   |   |    |    |    |    | 2  | 0.90  | 0  | 0.00  | 1.00            | 0               |
| 3                  | 010000000011    |    |   |   |   |   |   |   |   |   |    |    |    |    | 1  | 0.45  | 0  | 0.00  | 1.00            | 0               |
| 3                  | 110000010000    |    |   |   |   |   |   |   |   |   |    |    |    |    | 1  | 0.45  | 0  | 0.00  | 1.00            | 0               |
| 3                  | 010010000010    |    |   |   |   |   |   |   |   |   |    |    |    |    | 1  | 0.45  | 0  | 0.00  | 1.00            | 0               |
| 3                  | 110000000100    |    |   |   |   |   |   |   |   |   |    |    |    |    | 1  | 0.45  | 0  | 0.00  | 1.00            | 0               |
| 3                  | 0110000000100   |    |   |   |   |   |   |   |   |   |    |    |    |    | 1  | 0.45  | 0  | 0.00  | 1.00            | 0               |
| 3                  | 010000010100    |    |   |   |   |   |   |   |   |   |    |    |    |    | 6  | 2.69  | 1  | 1.20  | 0.86            | 5.00            |
| 3                  | 0110000001000   |    |   |   |   |   |   |   |   |   |    |    |    |    | 3  | 1.35  | 1  | 1.20  | 0.75            | 2.00            |
| 3                  | 0110000000010   |    |   |   |   |   |   |   |   |   |    |    |    |    | 3  | 1.35  | 1  | 1.20  | 0.75            | 2.00            |
| 3                  | 0100000001010   |    |   |   |   |   |   |   |   |   |    |    |    |    | 25 | 11.21 | 9  | 10.84 | 0.74            | 1.78            |
| 3                  | 010000011000    |    |   |   |   |   |   |   |   |   |    |    |    |    | 2  | 0.90  | 3  | 3.61  | 0.40            | -0.33           |
| 3                  | 0101000001000   |    |   |   |   |   |   |   |   |   |    |    |    |    | 0  | 0.00  | 1  | 1.20  | 0.00            | -1.00           |
| 3                  | 0100000100010   |    |   |   |   |   |   |   |   |   |    |    |    |    | 0  | 0.00  | 1  | 1.20  | 0.00            | -1.00           |
| 4                  | 0100000101100   |    |   |   |   |   |   |   |   |   |    |    |    |    | 9  | 4.04  | 0  | 0.00  | 1.00            | 0               |
| 4                  | 0100000100110   |    |   |   |   |   |   |   |   |   |    |    |    |    | 7  | 3.14  | 0  | 0.00  | 1.00            | 0               |
| 4                  | 11000000011000  |    |   |   |   |   |   |   |   |   |    |    |    |    | 3  | 1.35  | 0  | 0.00  | 1.00            | 0               |
| 4                  | 0100100001100   |    |   |   |   |   |   |   |   |   |    |    |    |    | 2  | 0.90  | 0  | 0.00  | 1.00            | 0               |
| 4                  | 01000000011100  |    |   |   |   |   |   |   |   |   |    |    |    |    | 2  | 0.90  | 0  | 0.00  | 1.00            | 0               |
| 4                  | 1110000000010   |    |   |   |   |   |   |   |   |   |    |    |    |    | 2  | 0.90  | 0  | 0.00  | 1.00            | 0               |
| 4                  | 0110000100100   |    |   |   |   |   |   |   |   |   |    |    |    |    | 1  | 0.45  | 0  | 0.00  | 1.00            | 0               |
| 4                  | 0101000001001   |    |   |   |   |   |   |   |   |   |    |    |    |    | 1  | 0.45  | 0  | 0.00  | 1.00            | 0               |
| 4                  | 01100000101000  |    |   |   |   |   |   |   |   |   |    |    |    |    | 1  | 0.45  | 0  | 0.00  | 1.00            | 0               |
| 4                  | 0101000001010   |    |   |   |   |   |   |   |   |   |    |    |    |    | 1  | 0.45  | 0  | 0.00  | 1.00            | 0               |
| 4                  | 010000010000110 |    |   |   |   |   |   |   |   |   |    |    |    |    | 1  | 0.45  | 0  | 0.00  | 1.00            | 0               |
| 4                  | 01000000001011  |    |   |   |   |   |   |   |   |   |    |    |    |    | 1  | 0.45  | 0  | 0.00  | 1.00            | 0               |
| 4                  | 1100000100001   |    |   |   |   |   |   |   |   |   |    |    |    |    | 1  | 0.45  | 0  | 0.00  | 1.00            | 0               |
| 4                  | 0100110000010   |    |   |   |   |   |   |   |   |   |    |    |    |    | 1  | 0.45  | 0  | 0.00  | 1.00            | 0               |
| 4                  | 11000000001100  |    |   |   |   |   |   |   |   |   |    |    |    |    | 1  | 0.45  | 0  | 0.00  | 1.00            | 0               |
| 4                  | 0100000101001   |    |   |   |   |   |   |   |   |   |    |    |    |    | 1  | 0.45  | 0  | 0.00  | 1.00            | 0               |
| 4                  | 01100000001001  |    |   |   |   |   |   |   |   |   |    |    |    |    | 1  | 0.45  | 0  | 0.00  | 1.00            | 0               |
| 4                  | 01000000001110  |    |   |   |   |   |   |   |   |   |    |    |    |    | 11 | 4.93  | 1  | 1.20  | 0.92            | 10.00           |
| 4                  | 11000000001010  |    |   |   |   |   |   |   |   |   |    |    |    |    | 8  | 3.59  | 2  | 2.41  | 0.80            | 3.00            |
| 4                  | 0100000101010   |    |   |   |   |   |   |   |   |   |    |    |    |    | 14 | 6.28  | 4  | 4.82  | 0.78            | 2.50            |
| 4                  | 0100000011010   |    |   |   |   |   |   |   |   |   |    |    |    |    | 8  | 3.59  | 4  | 4.82  | 0.67            | 1.00            |
| 4                  | 01100000011000  |    |   |   |   |   |   |   |   |   |    |    |    |    | 2  | 0.90  | 1  | 1.20  | 0.67            | 1.00            |
| 4                  | 01100000001010  |    |   |   |   |   |   |   |   |   |    |    |    |    | 3  | 1.35  | 3  | 3.61  | 0.50            | 0.00            |
| 4                  | 0100000110000   |    |   |   |   |   |   |   |   |   |    |    |    |    | 0  | 0.00  | 1  | 1.20  | 0.00            | -1.00           |
| 5                  | 1100000101010   |    |   |   |   |   |   |   |   |   |    |    |    |    | 2  | 0.90  | 0  | 0.00  | 1.00            | 0               |
| 5                  | 0100000111000   |    |   |   |   |   |   |   |   |   |    |    |    |    | 2  | 0.90  | 0  | 0.00  | 1.00            | 0               |
| 5                  | 01100000001110  |    |   |   |   |   |   |   |   |   |    |    |    |    | 2  | 0.90  | 0  | 0.00  | 1.00            | 0               |
| 5                  | 01001000011010  |    |   |   |   |   |   |   |   |   |    |    |    |    | 1  | 0.45  | 0  | 0.00  | 1.00            | 0               |
| 5                  | 0100000101011   |    |   |   |   |   |   |   |   |   |    |    |    |    | 1  | 0.45  | 0  | 0.00  | 1.00            | 0               |
| 5                  | 01001000011100  |    |   |   |   |   |   |   |   |   |    |    |    |    | 1  | 0.45  | 0  | 0.00  | 1.00            | 0               |
| 5                  | 01010000101010  |    |   |   |   |   |   |   |   |   |    |    |    |    | 1  | 0.45  | 0  | 0.00  | 1.00            | 0               |
| 5                  | 1100000100110   |    |   |   |   |   |   |   |   |   |    |    |    |    | 1  | 0.45  | 0  | 0.00  | 1.00            | 0               |
| 5                  | 0100100101001   |    |   |   |   |   |   |   |   |   |    |    |    |    | 1  | 0.45  | 0  | 0.00  | 1.00            | 0               |
| 5                  | 0100100100110   |    |   |   |   |   |   |   |   |   |    |    |    |    | 1  | 0.45  | 0  | 0.00  | 1.00            | 0               |
| 5                  | 0100100001110   |    |   |   |   |   |   |   |   |   |    |    |    |    | 1  | 0.45  | 0  | 0.00  | 1.00            | 0               |
| 5                  | 11100000001100  |    |   |   |   |   |   |   |   |   |    |    |    |    | 1  | 0.45  | 0  | 0.00  | 1.00            | 0               |
| 5                  | 0100000101110   |    |   |   |   |   |   |   |   |   |    |    |    |    | 22 | 9.87  | 3  | 3.61  | 0.88            | 6.33            |
| 5                  | 11000000011010  |    |   |   |   |   |   |   |   |   |    |    |    |    | 2  | 0.90  | 1  | 1.20  | 0.67            | 1.00            |
| 5                  | 11000000001110  |    |   |   |   |   |   |   |   |   |    |    |    |    | 2  | 0.90  | 2  | 2.41  | 0.50            | 0.00            |
| 5                  | 0100100101100   |    |   |   |   |   |   |   |   |   |    |    |    |    | 2  | 0.90  | 2  | 2.41  | 0.50            | 0.00            |
| 5                  | 0100000111010   |    |   |   |   |   |   |   |   |   |    |    |    |    | 1  | 0.45  | 1  | 1.20  | 0.50            | 0.00            |
| 5                  | 01100000011010  |    |   |   |   |   |   |   |   |   |    |    |    |    | 2  | 0.90  | 3  | 3.61  | 0.40            | -0.33           |
| 5                  | 10001000001110  |    |   |   |   |   |   |   |   |   |    |    |    |    | 0  | 0.00  | 2  | 2.41  | 0.00            | -1.00           |
| 5                  | 10100000011010  |    |   |   |   |   |   |   |   |   |    |    |    |    | 0  | 0.00  | 1  | 1.20  | 0.00            | -1.00           |
| 5                  | 10010000011010  |    |   |   |   |   |   |   |   |   |    |    |    |    | 0  | 0.00  | 2  | 2.41  | 0.00            | -1.00           |
| 5                  | 1000010011010   |    |   |   |   |   |   |   |   |   |    |    |    |    | 0  | 0.00  | 1  | 1.20  | 0.00            | -1.00           |
| 5                  | 1000000101110   |    |   |   |   |   |   |   |   |   |    |    |    |    | 0  | 0.00  | 1  | 1.20  | 0.00            | -1.00           |
| 5                  | 0000000111110   |    |   |   |   |   |   |   |   |   |    |    |    |    | 0  | 0.00  | 2  | 2.41  | 0.00            | -1.00           |
| 5                  | 00010000011110  |    |   |   |   |   |   |   |   |   |    |    |    |    | 0  | 0.00  | 1  | 1.20  | 0.00            | -1.00           |
| 5                  | 0001000011010   |    |   |   |   |   |   |   |   |   |    |    |    |    | 0  | 0.00  | 2  | 2.41  | 0.00            | -1.00           |
| 5                  | 10001000011100  |    |   |   |   |   |   |   |   |   |    |    |    |    | 0  | 0.00  | 1  | 1.20  | 0.00            | -1.00           |
| 5                  | 0000000101111   |    |   |   |   |   |   |   |   |   |    |    |    |    | 0  | 0.00  | 2  | 2.41  | 0.00            | -1.00           |
| 5                  | 00001000011110  |    |   |   |   |   |   |   |   |   |    |    |    |    | 0  | 0.00  | 1  | 1.20  | 0.00            | -1.00           |
| 5                  | 0000100111010   |    |   |   |   |   |   |   |   |   |    |    |    |    | 0  | 0.00  | 2  | 2.41  | 0.00            | -1.00           |
| 5                  | 1000000001011   |    |   |   |   |   |   |   |   |   |    |    |    |    | 0  | 0.00  | 1  | 1.20  | 0.00            | -1.00           |
| 5                  | 0101100001000   |    |   |   |   |   |   |   |   |   |    |    |    |    | 0  | 0.00  | 1  | 1.20  | 0.00            | -1.00           |
| 5                  | 1000000111010   |    |   |   |   |   |   |   |   |   |    |    |    |    | 0  | 0.00  | 1  | 1.20  | 0.00            | -1.00           |
| 5                  | 00010000011110  |    |   |   |   |   |   |   |   |   |    |    |    |    | 0  | 0.00  | 1  | 1.20  | 0.00            | -1.00           |
| 5                  | 00001001011000  |    |   |   |   |   |   |   |   |   |    |    |    |    | 0  | 0.00  | 2  | 2.41  | 0.00            | -1.00           |
| 5                  | 0001100110000   |    |   |   |   |   |   |   |   |   |    |    |    |    | 0  | 0.00  | 1  | 1.20  | 0.00            | -1.00           |
| 5                  | 10001000011010  |    |   |   |   |   |   |   |   |   |    |    |    |    | 0  | 0.00  | 2  | 2.41  | 0.00            | -1.00           |
| 5                  | 0000100101010   |    |   |   |   |   |   |   |   |   |    |    |    |    | 0  | 0.00  | 2  | 2.41  | 0.00            | -1.00           |
| 5                  | 10010000001011  |    |   |   |   |   |   |   |   |   |    |    |    |    | 0  | 0.00  | 1  | 1.20  | 0.00            | -1.00           |
| 5                  | 01000000011110  |    |   |   |   |   |   |   |   |   |    |    |    |    | 0  | 0.00  | 1  | 1.20  | 0.00            | -1.00           |
| 6                  | 0100100101110   |    |   |   |   |   |   |   |   |   |    |    |    |    | 4  | 1.79  | 0  | 0.00  | 1.00            | 0               |
| 6                  | 1100000101110   |    |   |   |   |   |   |   |   |   |    |    |    |    | 2  | 0.90  | 0  | 0.00  | 1.00            | 0               |
| 6                  | 11000000011110  |    |   |   |   |   |   |   |   |   |    |    |    |    | 1  | 0.45  | 0  | 0.00  | 1.00            | 0               |
| 6                  | 11100000010100  |    |   |   |   |   |   |   |   |   |    |    |    |    | 1  | 0.45  | 0  | 0.00  | 1.00            | 0               |
| 6                  | 01001000001011  |    |   |   |   |   |   |   |   |   |    |    |    |    | 1  | 0.45  | 0  | 0.00  | 1.00            | 0               |
| 6                  | 01100001011010  |    |   |   |   |   |   |   |   |   |    |    |    |    | 1  | 0.45  | 0  | 0.00  | 1.00            | 0               |
| 6                  | 01100000111010  |    |   |   |   |   |   |   |   |   |    |    |    |    | 1  | 0.45  | 0  | 0.00  | 1.00            | 0               |
| 6                  | 011000000101110 |    |   |   |   |   |   |   |   |   |    |    |    |    | 1  | 0.45  | 0  | 0.00  | 1.00            | 0               |
| 6                  | 011000000011110 |    |   |   |   |   |   |   |   |   |    |    |    |    | 1  | 0.45  | 0  | 0.00  | 1.00            | 0               |
| 6                  | 11010000011010  |    |   |   |   |   |   |   |   |   |    |    |    |    | 1  | 0.45  | 0  | 0.00  | 1.00            | 0               |
| 6                  | 11001001000110  |    |   |   |   |   |   |   |   |   |    |    |    |    | 1  | 0.45  | 0  | 0.00  | 1.00            | 0               |
| 6                  | 01000000010111  |    |   |   |   |   |   |   |   |   |    |    |    |    | 1  | 0.45  | 0  | 0.00  | 1.00            | 0               |
| 6                  | 00011001011110  |    |   |   |   |   |   |   |   |   |    |    |    |    | 0  | 0.00  | 1  | 1.20  | 0.00            | -1.00           |
| 6                  | 10001001011110  | </ |   |   |   |   |   |   |   |   |    |    |    |    |    |       |    |       |                 |                 |
